# Supplementary material for: N-Enriched carbon nanofibers for high energy density supercapacitors and Li-ion batteries
Source: Royal Society of Chemistry journal article supplement (doi:10.1039/c9ra05780c), 2019-01-01
Supplement: c9ra05780c1.pdf [file c9ra05780c1.pdf]

## Supporting information

### N-enriched Carbon Nanofibers for High Energy Density Supercapacitor and Li-ion Battery

Sayali B. Kale<sup>a</sup>, Manjiri A. Mahadadalkar<sup>b</sup>, Chang Hyo Kim<sup>c</sup>, Yoong Ahm Kim<sup>d</sup>, Manish S. Jayswal<sup>b</sup>, Kap Seung Yang<sup>d</sup> and Bharat B. Kale<sup>\*b</sup>

<sup>a</sup> Technology Department, Savitribai Phule Pune University, Pune, 411008, India.

<sup>b</sup> Centre for Materials for Electronic Technology, Ministry of Electronics and Information Technology, Govt. Of India, Panchwati, Pune-411008.

\*bbkale@cmet.gov.in.

<sup>c</sup> Multifunctional structural composite research centre, Korea Institute of Science and Technology, Jeonbuk branch, Chudong-ro 92, Bongdong-eup, Wanju-gun, Jeonbuk, 55324, Republic of Korea.

<sup>d</sup> Department of Polymer Engineering, Graduated School, School of Polymer Science and Engineering & Alan G. MacDiarmid Energy Research Institute, Chonnam National University, 77 Yongbong-ro, Buk-gu, Gwangju, 61186, Republic of Korea

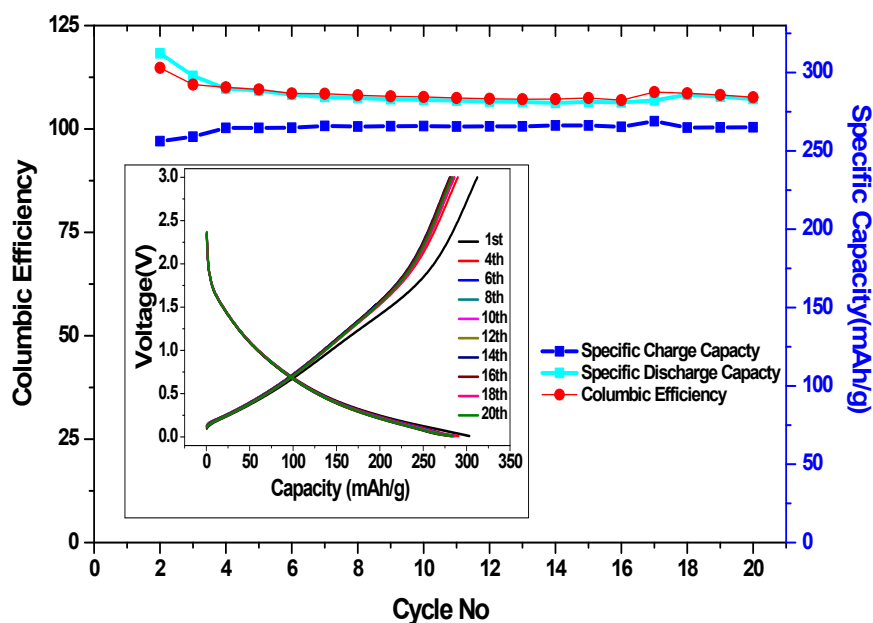

Fig. S1: Li-ion battery cycling performance of pristine carbon nanofibers (without N-doping) (Inset: charge –discharge curve for first 20 cycles)

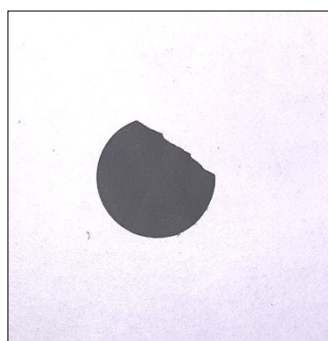

Fig. S2: Image of the free-standing film of CNFM5 sample
